# Supplementary material
Source: PubMed Central journal article supplement (PMC4610152)

# Supplementary Figure 2

**A****Raw Endogenous gene intensity**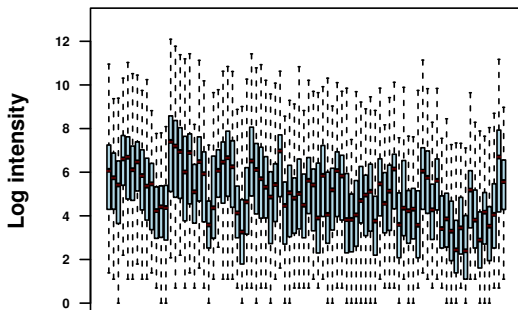**B****Positive and Negative Controls**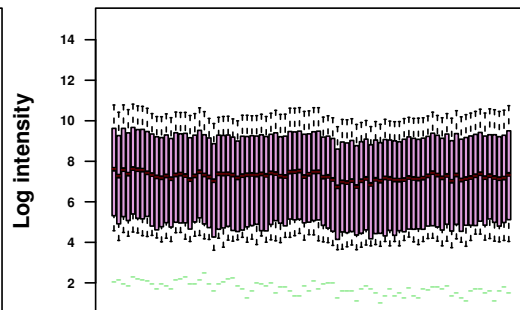**C****Invariant Endogenous Controls**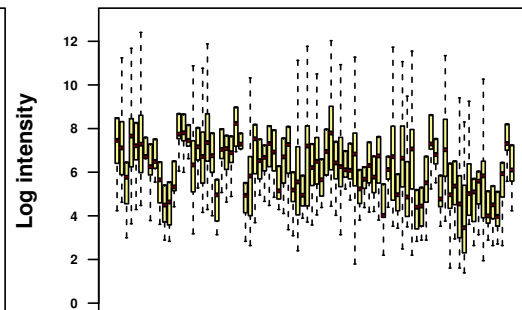**D****Normalized Invariant Endogenous Controls**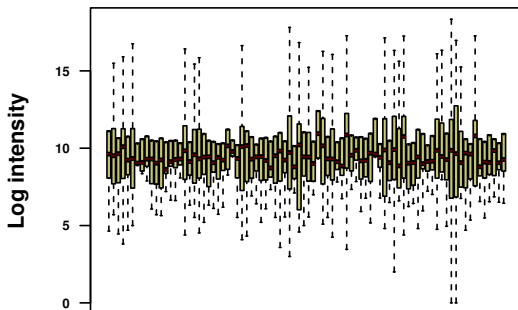**E****Normalized Endogenous gene intensity**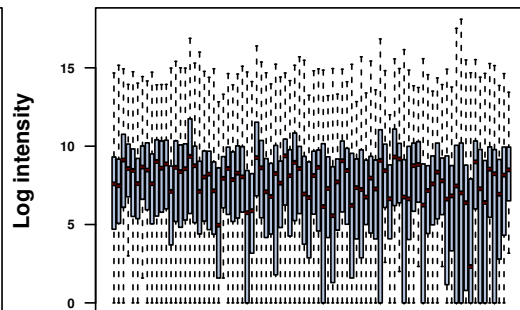**F**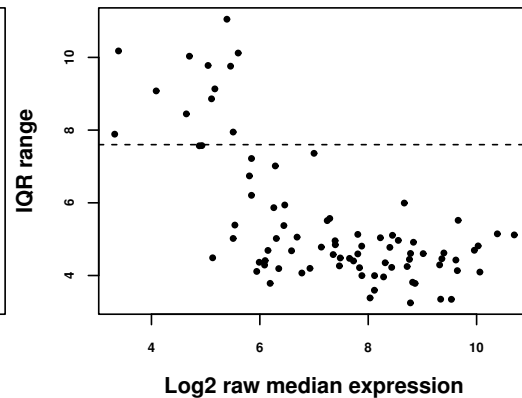

Supplement: NIHMS703443-supplement-3.pdf [file NIHMS703443-supplement-3.pdf]
