# Supplementary material
Source: PubMed Central journal article supplement (PMC4610152)

Supplementary Figure 1

**A**

ITCC/CIT dataset

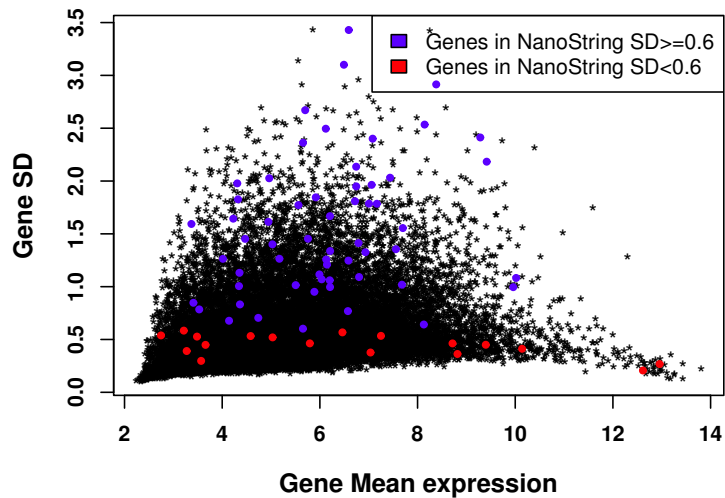

**B**

COG/IRSG dataset

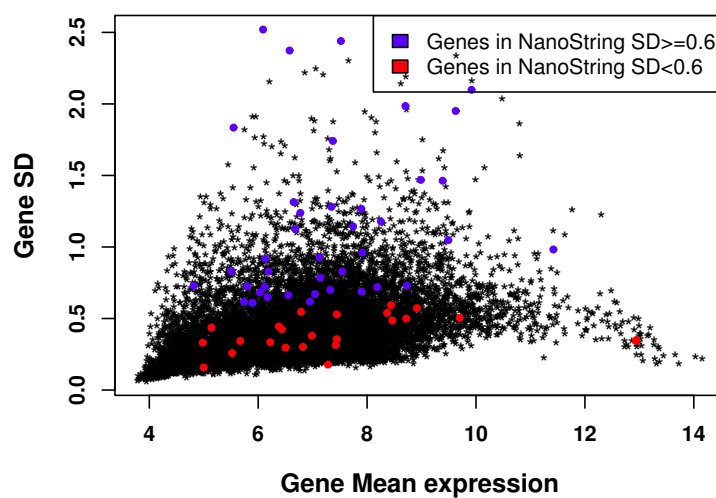

**C**

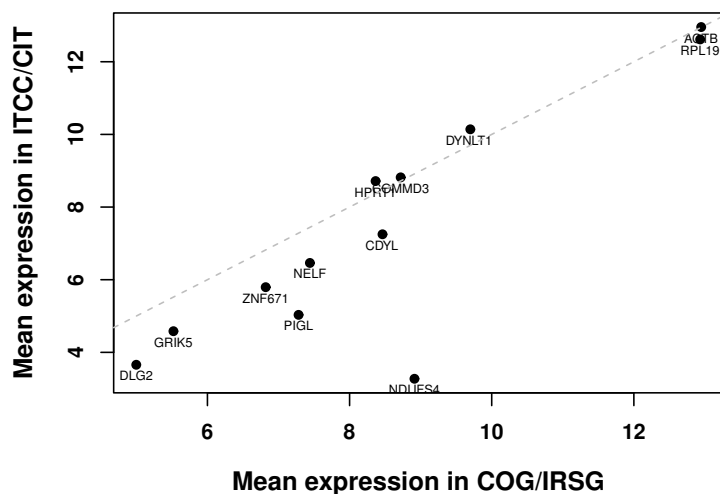

Supplement: NIHMS703443-supplement-2.pdf [file NIHMS703443-supplement-2.pdf]

# Supplementary Figure 3

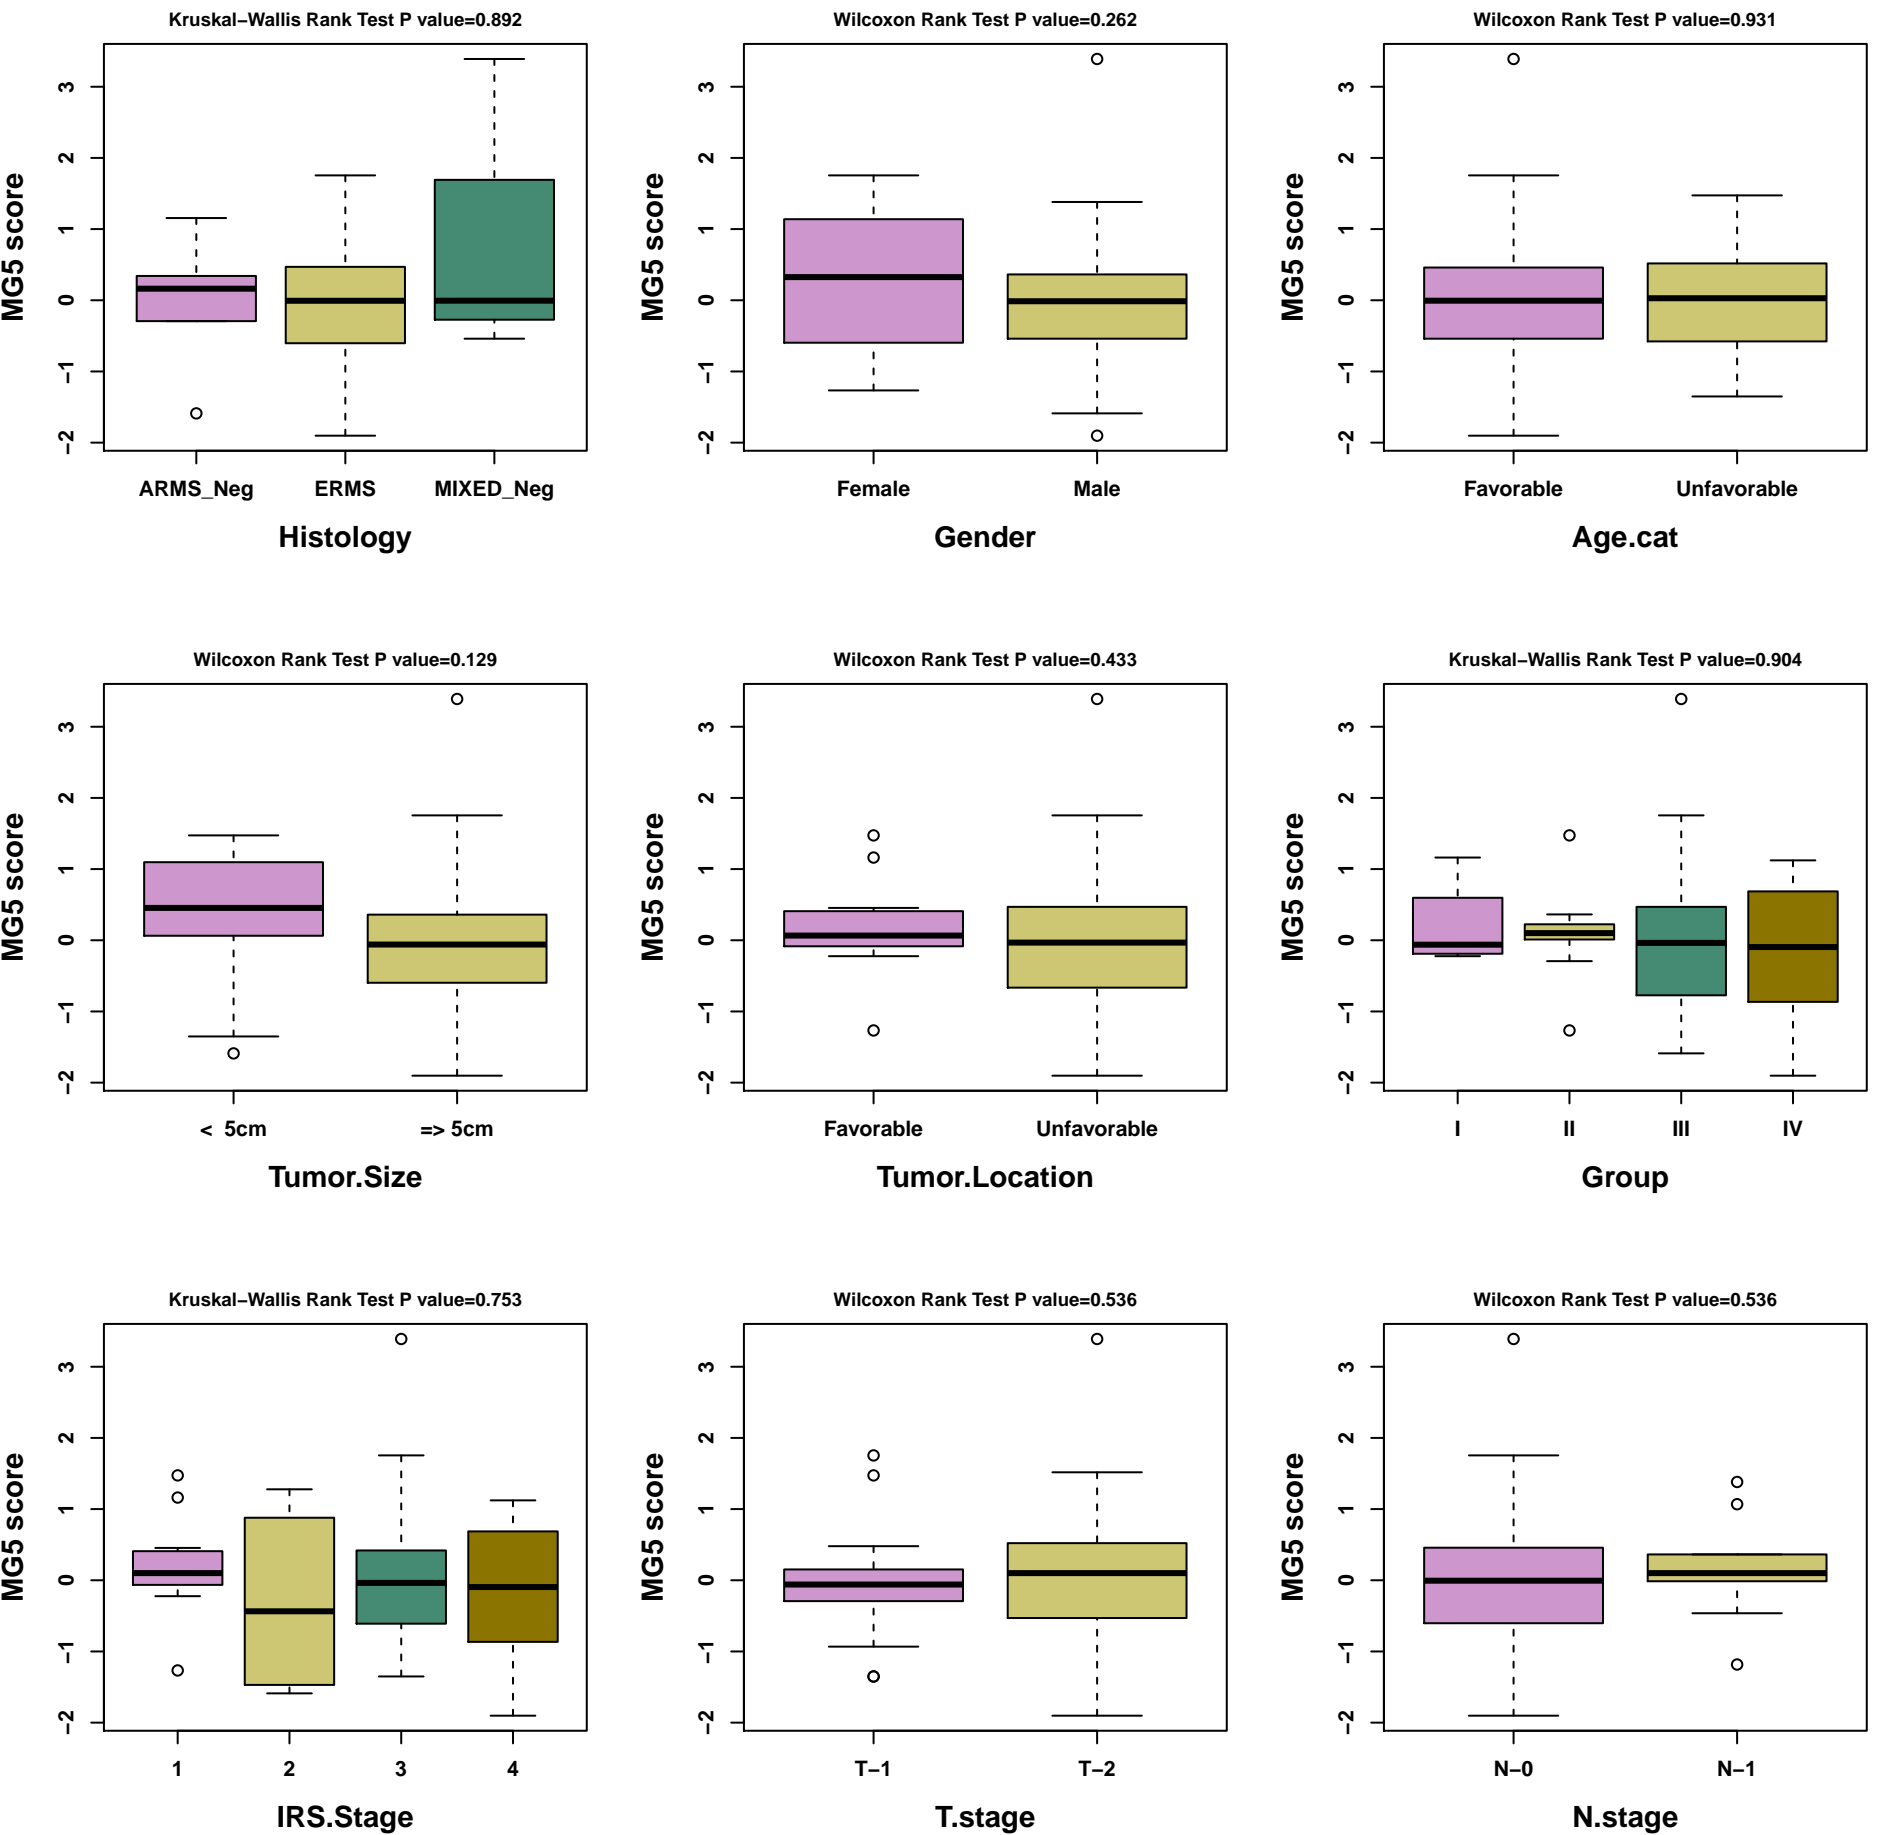

Supplement: NIHMS703443-supplement-4.pdf [file NIHMS703443-supplement-4.pdf]
